# Supplementary material for: Bio-inspired peptide decorated dendrimers for a robust antibacterial coating on hydroxyapatite
Source: Royal Society of Chemistry journal article supplement (doi:10.1039/c7py00811b), 2017-01-01
Supplement: c7py00811b1.pdf [file c7py00811b1.pdf]

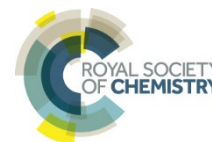

Supporting Information

**Bio-inspired peptide decorated dendrimer for a robust antibacterial coating on hydroxyapatite**

Yaping Gou,<sup>a,b,#</sup> Xiao Yang<sup>a,#</sup> Libang He,<sup>b,#</sup> Xinyuan Xu,<sup>a</sup> Yanpeng Liu,<sup>a</sup> Yuebo Liu,<sup>b</sup> Yuan Gao,<sup>b</sup> Qin Huang,<sup>a</sup> Kunneng Liang,<sup>b</sup> Chunmei Ding,<sup>a</sup> Jiyao Li,<sup>b,\*</sup> Changsheng Zhao<sup>a</sup> and Jianshu Li<sup>a,\*</sup>

<sup>a</sup> College of Polymer Science and Engineering, State Key Laboratory of Polymer Materials Engineering, Sichuan University, Chengdu, 610065, China. Fax: 86-28-85405402; Tel:86-28-85466755; E-mail: jianshu\_li@scu.edu.cn (JS. Li) ;

<sup>b</sup> State Key Laboratory of Oral Diseases, West China Hospital of Stomatology, Sichuan University, Chengdu, 610041, China. E-mail: jiyaoliscu@163.com (JY. Li);

<sup>#</sup> These authors contributed equally to this work.

Step 1: Acryloyl chloride grafted amine-terminated PAMAM (acryloyl-PAMAM-NH<sub>2</sub>)

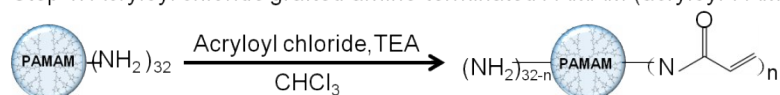

Step 2: Fmoc protected DDDEKC conjugate with the acryloyl-PAMAM-NH<sub>2</sub>

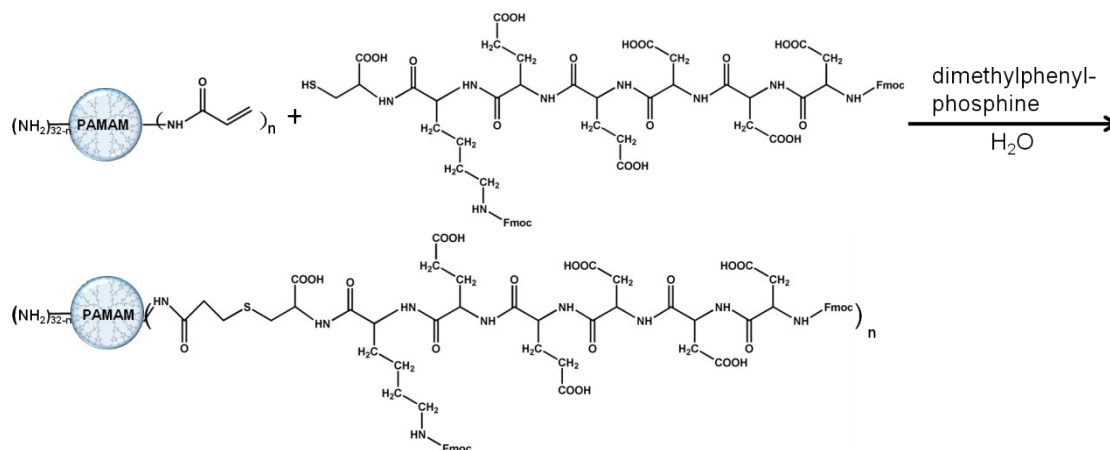

Step 3: Deprotection reaction

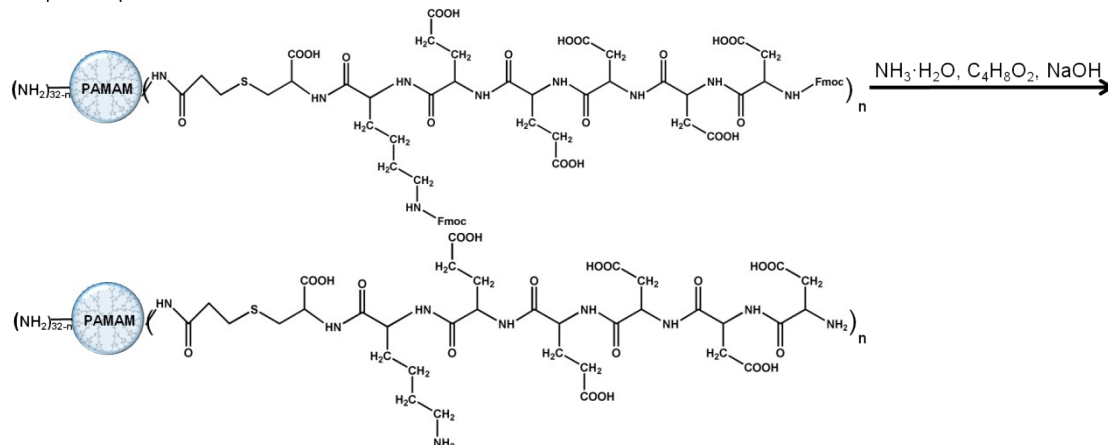

**Figure S1.** Schematic illustration of the synthesis of bioinspired SSP-PAMAM-NH<sub>2</sub> dendrimer.

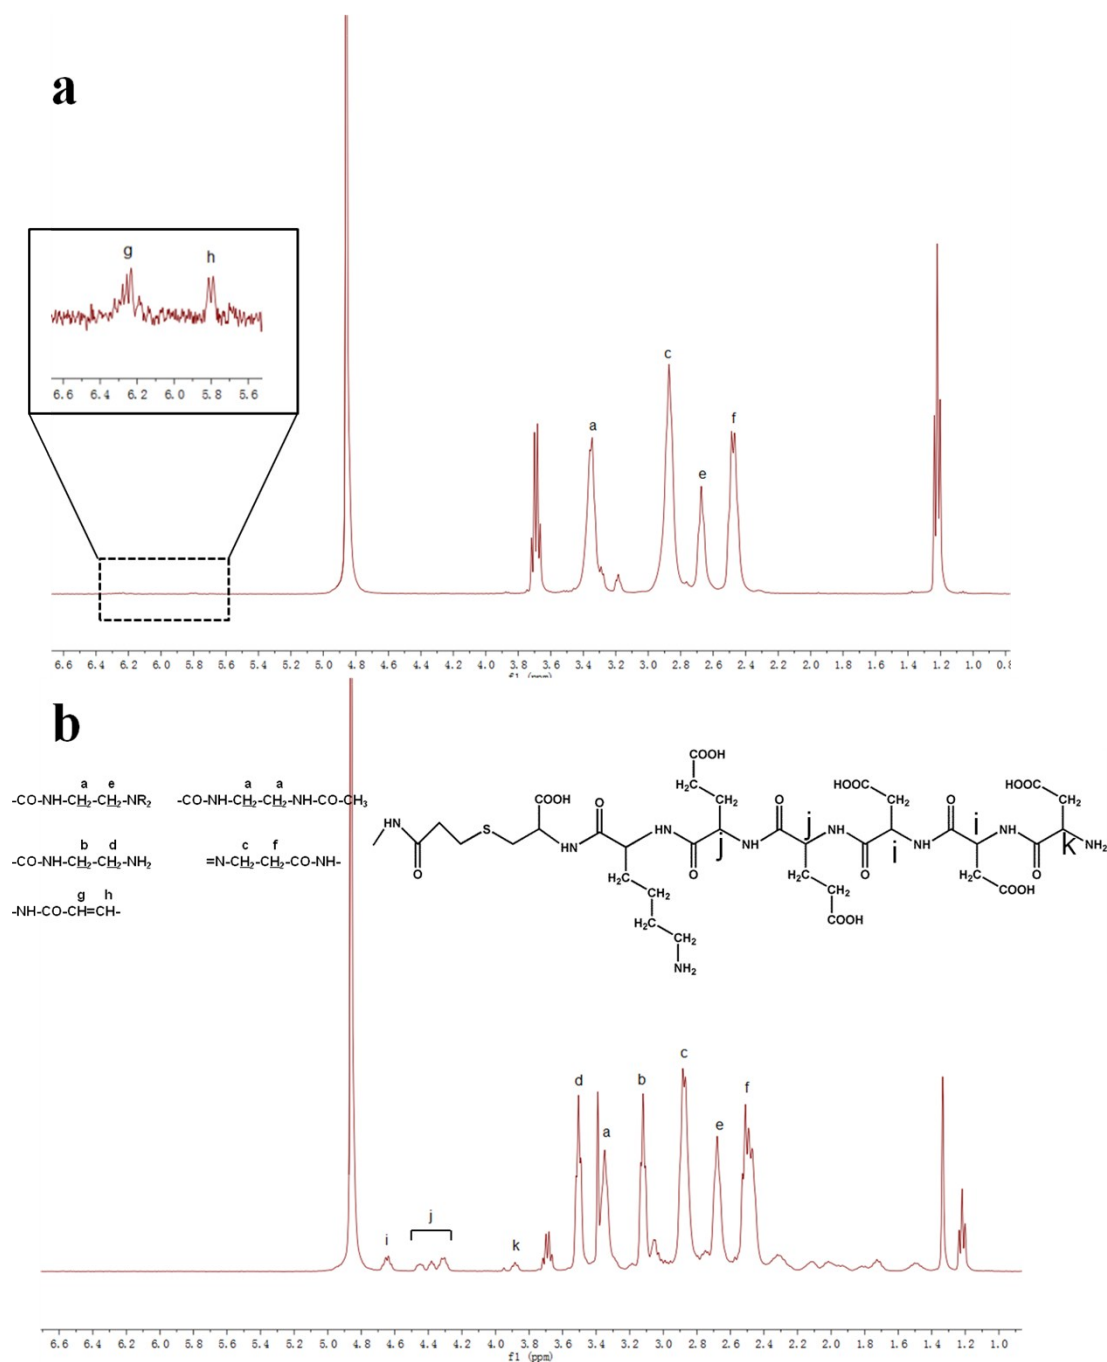

**Figure S2.**  $^1\text{H}$  NMR of acryloyl-PAMAM-NH<sub>2</sub> (a) and SSP-PAMAM-NH<sub>2</sub> (b).

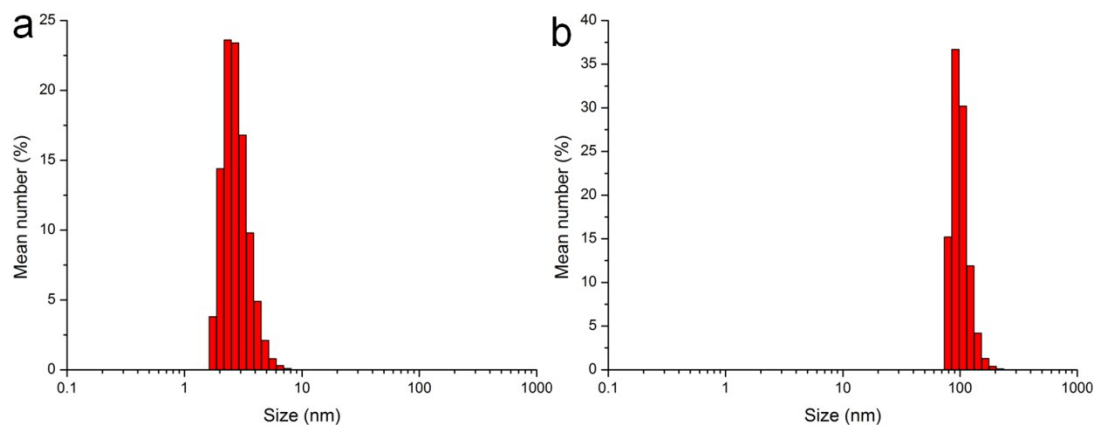

**Figure S3.** DLS data of (a) PAMAM-NH<sub>2</sub> and (b) SSP-PAMAM-NH<sub>2</sub> in solution.

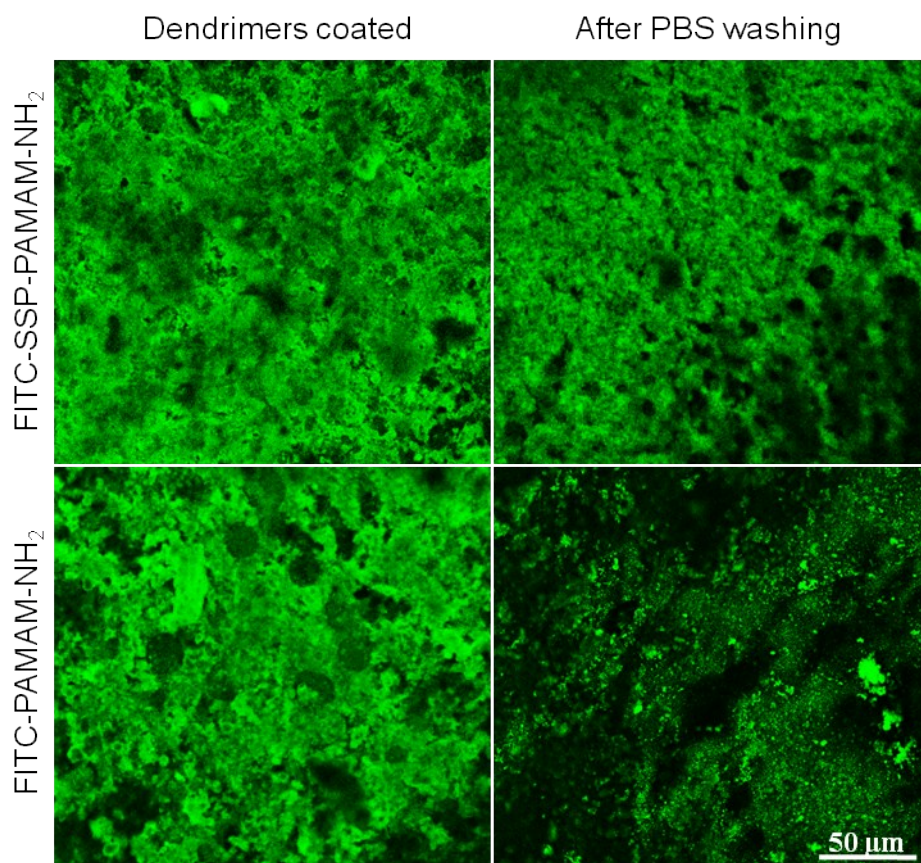

**Figure S4.** CLSM of HA disks coated with dendrimers, and the sample after PBS washing.

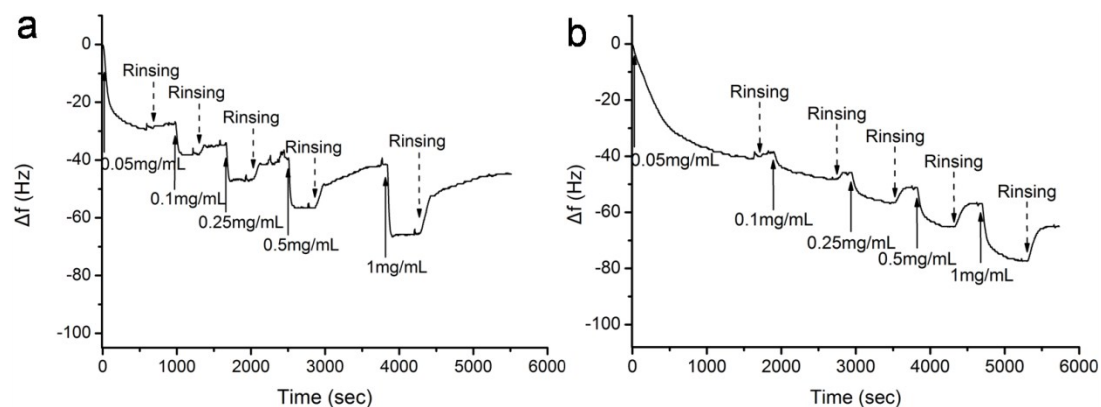

**Figure S5.** QCM-D results of the dendrimer adsorption behaviours on the surface of HA-coated quartz chips. Representative  $\Delta f$  curves of (a) PAMAM-NH<sub>2</sub> and (b) SSP-PAMAM-NH<sub>2</sub> at different concentrations.

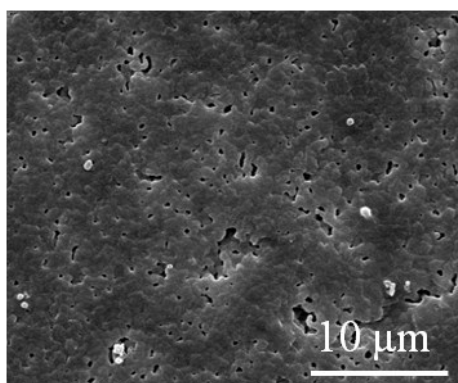

**Figure S6.** SEM image of the bare HA disk.

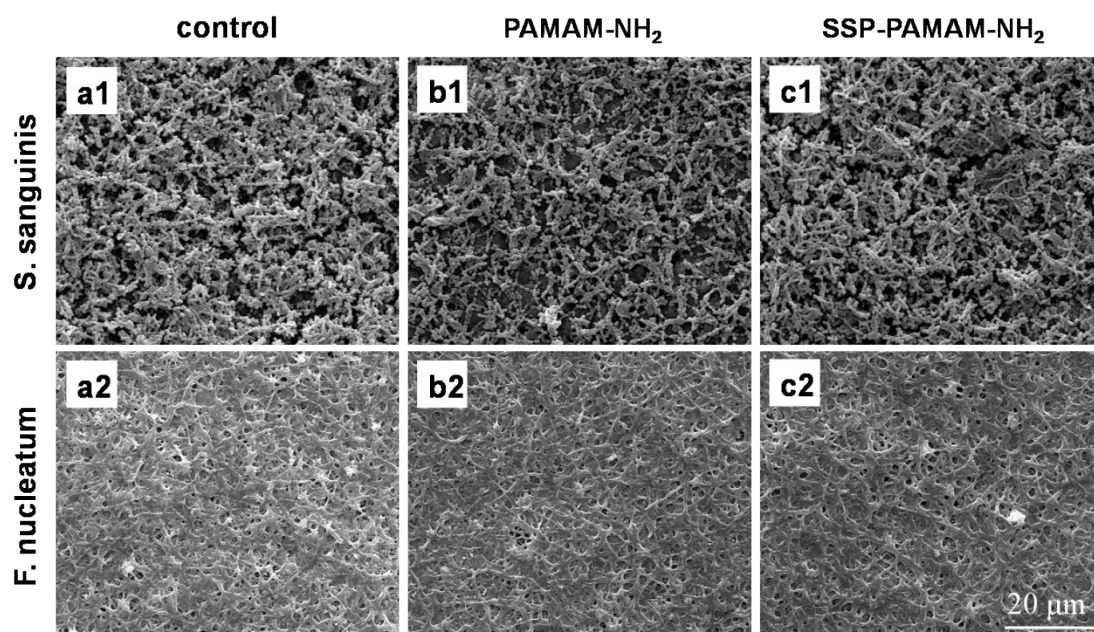

Figure S7. SEM images of typical biofilms of *S. sanguinis* (a1, b1 and c1) and *F. nucleatum* (a2, b2 and c2) on the surface of HA without treatment (a group, control), coated with PAMAM-NH<sub>2</sub> (b group) and SSP-PAMAM-NH<sub>2</sub> (c group).



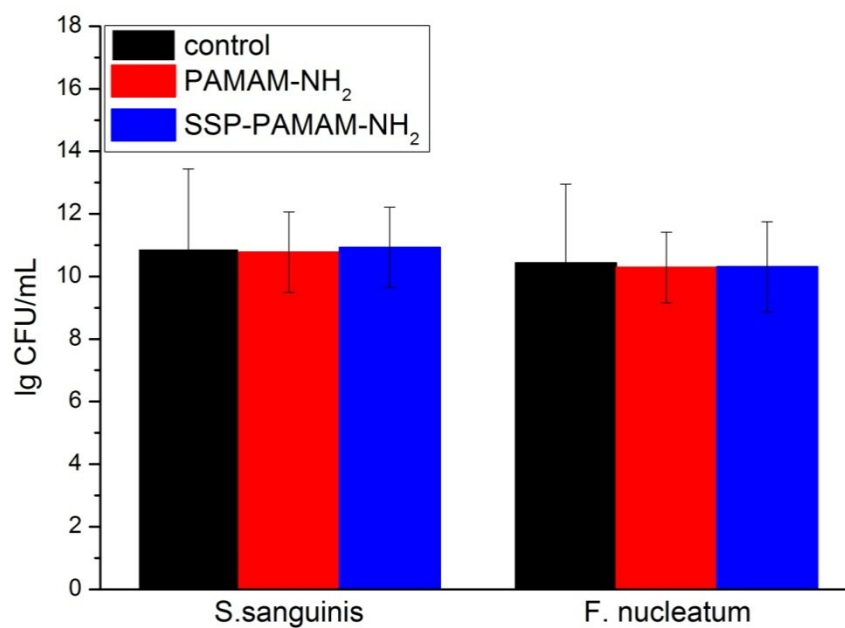

Figure S8. Colony-forming unit counts of biofilms formed on bare HA disk (control), PAMAM-NH<sub>2</sub> coated HA, and SSP-PAMAM-NH<sub>2</sub> coated HA. Data are presented as mean  $\pm$  standard deviation.

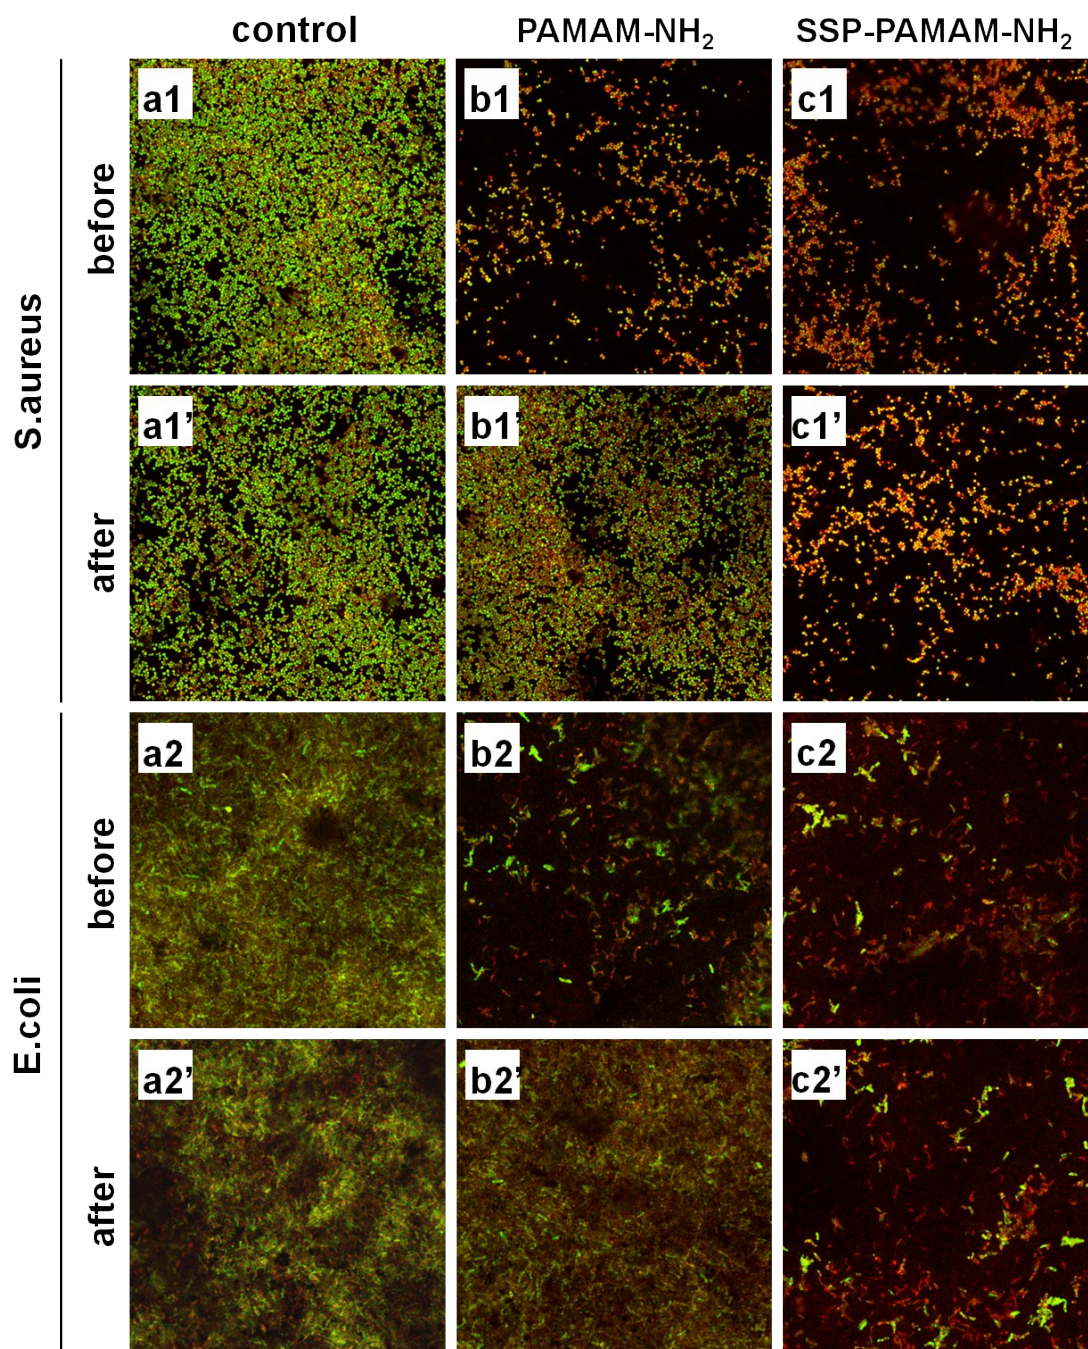

**Figure S9.** Live/dead bacteria staining of typical biofilms of *S. aureus* and *E. coli* on the surface of HA without treatment/control (a group), coated with PAMAM-NH<sub>2</sub> (b group) and SSP-PAMAM-NH<sub>2</sub> (c group), before (*S. aureus*: a1, b1 and c1; *E. coli*: a2, b2 and c2) and after (*S. aureus*: a1', b1' and c1'; *E. coli*: a2', b2' and c2') being incubated in PBS for 4 weeks. Live bacteria dye green, dead bacteria dye red, adjacent live and dead bacteria are presented as yellow when they are merged.
